# Supplementary material for: Comparative Chloroplast Genomics of Sophora Species: Evolution and Phylogenetic Relationships in the Early-Diverging Legume Subfamily Papilionoideae (Fabaceae)
Source: Front Plant Sci. 2021 Dec 16;12:778933. doi: 10.3389/fpls.2021.778933 (PMC8716937; doi:10.3389/fpls.2021.778933)
Supplement: Supplementary file 2 [file Data_Sheet_2.XLSX]

## Sheet: Table S1
Table S1. List of species used for phylogenetic tree construction.
Species	GenBank accession	Distibution and Reference
Sophora albescens	MW940392	China: Sichuan, Shimian, M. Liao et al., LM2020001 (CDBI)
Sophora dunnii	MW940393	China: Sichuan, Mianning, M. Liao et al., LM2020003 (CDBI)
Sophora franchetiana	MW940394	China: Zhejiang, Ningbo, K. W. Jiang, NY001 (CDBI)
Sophora moorcroftiana	MW940395	China: Tibet, Milin, Xu et al., YLZB1518 (CDBI)
Sophora prazeri	MW940396	China: Guangxi, Lingyun, M. Liao and J.Y.Zhang, XB1943 (CDBI)
Sophora tomentosa	MW940397	China: Yunnan, Menghai, M. Liao and J.Y.Zhang, LM190031 (CDBI)
Sophora velutina	MW940398	China: Sichuan, Yanbian, Q. Yu, and W. T. Dai, LM190045 (CDBI)
Sophora wilsonii	MW940399	China: Sichuan, Dujiangyan, M. Liao and J. Y. Zhang, LM190043 (CDBI)
Sophora davidii	MW940400	China: Sichuan, Xiangcheng, M. Liao et al., XB2185 (CDBI)
Sophora alopecuroides	NC_036102	Duan et al., 2019
Sophora flavescens	MH748034	Zhang et al., 2018
Sophora tonkinensis	NC_042688	Zhang et al., unpublished data
Sophora macrocarpa	MT079958	Pezoa et al., 2021
Sophora toromiro	MT536779	Pezoa et al., 2021
Ammopiptanthus mongolicus	MK704436	Ni et al., 2019
Ammopiptanthus nanus	NC_034743	Feng and He, unpublished data
Salweenia bouffordiana	MF449303	Wariss et al., 2018
Thermopsis alpina	MN709885	Zhang et al., 2020a
Maackia floribunda	KX388160	Choi and Choi, 2017
Arachis duranensis	MN709819	Zhang et al., 2020a
Tipuana tipu	MN709800	Zhang et al., 2020a
Dermatophyllum secundiflorum	NC_047349	Zhang et al., 2020a
Poecilanthe parviflora	MN709878	Zhang et al., 2020a
Lupinus luteus	NC_023090	Martin et al., 2014
Lupinus albus	NC_026681	Sabir et al., unpublished data
Lupinus westianus	NC_036487	Xu et al., unpublished data
Genista tinctoria	MN709859	Zhang et al., 2022a
Ormosia emarginata	NC_045104	Liu et al., 2019a
Ormosia xylocarpa	NC_045105	Liu et al., 2019a
Ormosia semicastrata	NC_045106	Liu et al., 2019a
Ateleia glazioveana	MN709820	Zhang et al., 2020a
Angylocalyx braunii	MN709877	Zhang et al., 2020a
Styphnolobium japonicum f. violaceum	KY872756	Lu et al., 2018
Styphnolobium japonicum	NC_045071	Liu et al., unpublished data
Dalbergia cultrata	MK599253	Liu et al., unpublished data
Dalbergia odorifera	MT009405	Win et al., 2020
Dalbergia oliveri	MT009406	Win et al., 2021
Pterocarpus indicus	MH033831	Jiao et al., unpublished data
Pterocarpus tinctorius	MH033829	Jiao et al., unpublished data

## Sheet: Table S2
Table S2. Summary of the characteristics of Sophora chloroplast genomes.
Name of Taxon	S. alopecuroides	S. flavescens	S. tonkinensis	S. albescens	S. davidii	S. dunnii	S. franchetiana	S. moorcroftiana	S. prazeri	S. tomentosa	S. velutina	S. wilsonii	S. macrocarpa	S. toromiro
GenBank accession	NC_036102*	MH748034*	NC_042688*	MW940392	MW940400	MW940393	MW940394	MW940395	MW940396	MW940397	MW940398	MW940399	MT536779*	MT079958*
Genome size (bp)	154108	154378	155640	154797	153622	154872	153081	152953	155378	155086	154707	158087	154426	154260
LSC size (bp)	84221	84516	85585	85025	83951	85127	83138	83345	83164	85102	84959	83403	85679	85818
IR size (bp)	25874	25876	25922	25870	25827	25869	26180	25800	28301	25821	25871	30609	24806	24775
SSC size (bp)	18139	18110	18211	18032	18017	18007	17583	18008	15612	18342	18006	13466	19135	19092
Number of genes	129 (18)	130 (18)	129 (18)	130(18)	130(18)	130(18)	130(18)	130(18)	129(18)	130(18)	130(18)	130(18)	130(17)	130(17)
Number of protein-coding genes	83(7)	84 (7)	83 (7)	84 (7)	84 (7)	84 (7)	84 (7)	84 (7)	83 (7)	84 (7)	84 (7)	84 (7)	84 (6)	84 (6)
Number of tRNA genes	38 (7)	38 (7)	38 (7)	38 (7)	38 (7)	38 (7)	38 (7)	38 (7)	38 (7)	38 (7)	38 (7)	38 (7)	38 (7)	38 (7)
Number of rRNA genes	8 (4)	8 (4)	8 (4)	8 (4)	8 (4)	8 (4)	8 (4)	8 (4)	8 (4)	8 (4)	8 (4)	8 (4)	8 (4)	8 (4)
GC content (%)	36.6	36.6	36.4	36.4	36.7	36.4	36.3	36.7	36.2	36.3	36.5	36.1	36.5	36.4
GC content in LSC (%)	34.2	34.2	33.9	34	34.3	34	33.8	34.2	33.9	33.8	34	33.9	34.2	34.1
GC content in IR (%)	42.8	42.7	42.7	42.7	42.9	42.8	42.5	42.9	41.4	42.9	42.7	40.3	42.9	42.8
GC content in SSC (%)	30	30	29.9	29.9	30.3	30	29.9	30.2	30.2	29.5	30	30.6	30.3	30.2
inversion(bp)	22615	22602	23355	23306	22708	23380	23079	22751	22614	23308	23224	22641	22746	22697
*Sequences downloaded from GenBank. Numbers in brackets indicate genes duplicated in the IR regions.

## Sheet: Table S3
Table S3. Nucleotide content of IR, LSC, and SSC in the chloroplast genomes of fourteen Sophora species.
	IR					LSC					SSC
	T	C	A	G		T	C	A	G		T	C	A	G
S. alopecuroides	28.5	22.3	28.7	20.5		32.9	16.6	32.9	17.5		35	14.1	35	15.9
S. flavescens	28.7	22.3	28.6	20.4		32.9	16.6	33	17.6		35.2	14	34.8	16
S. tonkinensis	28.6	22.3	28.7	20.4		33	16.5	33	17.5		35	14.1	35.1	15.8
S. albescens	28.6	22.3	28.6	20.4		32.9	16.5	33.1	17.5		35	15.8	35.1	14.1
S. davidii	28.5	22.3	28.6	20.5		32.8	16.7	32.9	17.6		34.9	16	34.8	14.3
S. dunnii	28.6	22.4	28.6	20.4		33	16.5	33.1	17.5		35	15.9	35	14.1
S. franchetiana	28.7	22.2	28.8	20.3		33.1	16.4	33.2	17.4		35	15.8	35.1	14.1
S. moorcroftiana	28.5	22.4	28.6	20.5		32.9	16.7	32.9	17.5		34.9	16	34.9	14.2
S. prazeri	29.8	21.7	28.8	19.7		33	16.5	33.1	17.4		33.9	15.9	35.9	14.2
S. tomentosa	28.7	22.3	28.6	20.4		33	16.4	33.2	17.4		35.1	15.6	35.4	13.9
S. velutina	28.6	22.4	28.6	20.4		32.9	16.5	33.1	17.5		35	15.9	35	14.1
S. wilsonii	30.8	21.1	28.9	19.2		33	16.5	33	17.4		32.5	16.2	36.9	14.4
S. macrocarpa	28.4	20.3	28.8	22.5		32.9	16.5	33	17.6		34.8	16	35	14.2
S. toromiro	28.8	22.5	28.3	20.3		32.8	16.6	33	17.3		34.7	16	35	14.4

## Sheet: Table S4
Table S4. List of annotated genes in Sophora chloroplast genomes
Gene group	Gene name
Subunits of photosystem I	psaA, psaB, psaC, psaI, psaJ
Submits of photosystem II	psbA, psbB, psbC, psbD, psbE, psbF, psbH, psbI, psbJ, psbK, psbL, psbM, psbN, psbT
Subunits of NADH dehydrogenase	ndhA, ndhB*, ndhC, ndhD, ndhE, ndhF, ndhG, ndhH, ndhI, ndhJ, ndhK
cytochrome b-f complex	petA, petB, petD, petG, petL, petN
Subunits of ATP synthase	atpA, atpB, atpE, atpF, atpH, atpI
Large subunit of rubisco	rbcL
Proteins of large ribosomal subunit	rpl2*, rpl14, rpl16, rpl20, rpl23*, rpl32, rpl33, rpl36
Proteins of small ribosomal subunit	rps2, rps3, rps4, rps7*, rps8, rps11, rps12*, rps14, rps15, rps16, rps18, rps19
Subunits of RNA polymerase	rpoA, rpoB, rpoC1, rpoC2
Ribosomal RNAs	rrn16(2), rrn23(2), rrn5(2), rrn4.5(2)
Transfer RNAs	trnA-UGC*, trnC-GCA, trnD-GUC, trnE-UUC*, trnF-GAA, trnG-UCC, trnH-GUG, trnl-CAU, trnl-GAU, trnK-UUU, trnL-UAA, trnY-GUA, trnL-CAA, trnL-UAG, trnM-CAU*, trnfM-CAU, trnN-GUU*, trnP-GGG, trnP-UGG, trnQ-UUG, trnR-ACG, trnR-CCG, trnR-UCU*, trnS-GCU, trnS-UGA, trnS-CGA, trnT-CGU, trnT-UGU, trnV-GAC*, trnV-UAC, trnW-CCA
Maturase	matK
Protease	clpP
Envelope membrane protein	cemA
Acetyl-CoA carboxylase	accD
c-type cytochrome synthesis gene	ccsA
Translation initiation factor	infA
Conserved open reading frames	ycf1, ycf2, ycf3, ycf4
*Genes present in the IR regions.

## Sheet: Table S5
Table S5. List of intron numbers of genes in the chloroplast genomes of Sophora.
Genes	S. albescens	S. alopecuroides	S. davidii	S. dunnii	S. flavescens	S. franchetiana	S. macrocarpa	S. moorcrofitiana	S. prazeri	S. tomentosa	S. tonkinensis	S. toromiro	S. velutina	S.wilsonii
trnK-UUU	1	1	1	1	1	1	1	1	1	1	1	1	1	1
trnV-UAC	1	1	1	1	1	1	2	1	1	1	1	2	1	1
rpoC1	2	2	2	2	2	2	2	2	2	2	2	2	2	2
atpF	1	1	1	1	1	1	2	1	2	1	1	2	1	2
trnT-CGU	-	-	-	-	-	-	1	-	-	-	-	-	-	-
trnG-UCC	1	1	1	1	1	1	1	1	1	1	1	1	1	1
trnL-UAA	1	1	1	1	1	1	1	1	1	1	1	1	1	1
ycf3	4	4	4	4	4	4	2	4	4	4	3	2	4	4
rps16	1	1	1	1	1	-	1	-	2	1	-	1	1	-
clpP1	2	2	2	2	2	2	2	2	2	2	2	2	2	2
petB	1	1	1	1	1	1	1	1	1	1	1	1	1	1
petD	1	1	1	1	1	1	1	1	1	1	1	1	1	1
rpl16	1	1	1	1	1	1	1	1	1	1	1	1	1	1
rpl2	1	1	1	1	1	1	1	1	1	1	1	1	1	1
ndhB	1	1	1	1	1	1	1	1	1	1	1	1	1	1
rps12	2	1	1	2	1	1	1	1	1	1	1	1	2	1
trnI-GAU	1	1	1	1	1	1	2	1	1	1	1	2	1	1
trnA-UGC	1	1	1	1	1	1	2	1	1	1	1	2	1	1
ndhA	2	2	2	2	2	2	-	2	2	2	2	2	2	2
rrn23	-	-	-	-	-	-	1	-	-	-	-	1	-	-

## Sheet: Table S6
Table S6. SSR comparison of fourteen Sophora species.
	Mononnucleotide		Dinucleotide		Trinucleotide			Tetranucleotide									Pentanucleotide										Hexanucleotide
	A/T	C/G	AG/CT	AT/AT	AAG/CTT	AAT/ATT	AGC/CTG	AAAT/ATTT	AAAC/GTTT	AACT/AGTT	AATC/ATTG	AATG/ATTC	ACAT/ATGT	ACCC/GGGT	AATT/AATT	AGAT/ATCT	AAGAT/ATCTT	AATAT/ATATT	ACTAT/AGTAT	ATATC/ATATG	AAAAG/CTTTT	AAACT/AGTTT	AGCAT/ATGCT	AATCT/AGATT	AATAG/ATTCT	AGCAT/ATGCT	AATCAT/ATGATT	AAAAAT/ATTTTT	AAGTAT/ACTTAT
S. alopecuroides	78	1	2	25	1	5	0	5	1	1	0	1	1	0	3	1	1	0	0	0	1	0	0	0	1	0	0	0	0
S. flavescens	68	5	0	18	1	4	0	2	0	0	0	2	1	0	2	1	0	1	0	0	0	0	0	0	0	0	0	0	0
S. tonkinensis	69	3	0	18	1	2	0	3	0	0	0	3	0	0	1	0	1	0	1	2	1	1	0	0	0	1	1	0	0
S. albescens	88	3	2	18	1	6	0	5	0	0	0	3	1	0	1	0	0	0	0	0	0	0	0	0	0	0	0	0	0
S. davidii	82	5	2	28	1	5	0	4	1	0	1	1	1	0	2	2	0	0	0	0	1	1	0	0	1	0	0	0	0
S. dunnii	92	4	2	19	1	6	0	5	0	0	0	3	1	0	1	0	0	0	0	0	1	1	1	1	0	0	1	0	0
S. franchetiana	121	6	2	21	0	7	0	2	0	0	0	2	1	0	1	1	0	0	0	0	0	0	0	0	0	0	0	0	0
S. moorcroftiana	71	3	2	28	1	7	0	5	1	0	2	1	1	0	0	1	0	0	0	0	1	0	0	0	1	0	0	0	0
S. prazeri	98	4	2	21	1	4	1	5	1	0	0	2	1	1	1	1	1	0	0	1	0	0	0	0	1	0	0	0	0
S. tomentosa	92	5	2	21	1	12	0	4	0	0	0	2	1	0	3	1	0	0	0	0	0	0	0	0	0	0	0	1	1
S. velutina	87	5	2	18	1	7	0	4	0	0	0	3	1	0	1	0	0	0	0	0	1	1	1	1	0	0	1	0	0
S. wilsonii	111	9	1	22	1	8	0	5	0	0	0	2	1	0	1	2	0	0	0	0	2	0	0	0	2	0	0	0	0
S. macrocarpa	109	4	2	22	1	0	9	2	0	0	0	0	1	0	3	1	0	0	0	0	1	0	0	0	0	0	0	0	1
S. toromiro	97	6	2	20	1	9	1	2	0	0	0	0	1	0	3	1	0	1	0	0	1	0	0	0	0	0	0	0	1
	Mononucleotide	Dinucleotide	trinucleotide	Tetranucleotide	Pentanucleotide	Hexanucleotide	Total
S. alopecuroides	79	27	6	13	3	0	128
S. flavescens	73	18	5	8	1	0	105
S. tonkinensis	72	18	3	7	7	1	108
S. albescens	91	20	7	10	0	0	128
S. davidii	87	30	6	12	3	0	138
S. dunnii	96	21	7	10	4	1	139
S. franchetiana	127	23	7	7	0	0	164
S. moorcroftiana	74	30	8	11	2	0	125
S. prazeri	102	23	6	12	3	0	146
S. tomentosa	97	23	13	11	0	2	146
S. velutina	92	20	8	9	4	1	134
S. wilsonii	120	23	9	11	4	0	167
S. macrocarpa	113	24	10	7	1	1	156
S. toromiro	103	22	11	7	2	1	146

## Sheet: Table S7
Table S7. Repeat sequence analysis of fourteen Sophora chloroplast genomes with different Hamming distances.
Species	Hamming distance=1					Hamming distance=2					Hamming distance=3
	F	R	C	P	Total	F	R	C	P	Total	F	R	C	P	Total		Tandem
S. alopecuroides	10	0	0	10	20	13	1	0	17	31	20	0	1	27	48		44
S. flavescens	4	1	0	16	21	11	3	0	17	31	20	3	0	15	38		51
S. tonkinensis	16	7	3	16	42	15	7	3	16	41	12	5	3	16	36		71
S. albescens	12	1	0	9	22	13	7	0	16	36	18	10	0	24	52		34
S. davidii	8	0	0	7	15	14	1	0	14	29	21	1	1	22	45		42
S. dunnii	13	1	0	10	24	14	7	1	17	39	17	8	1	18	44		41
S. franchetiana	11	0	0	10	21	15	1	0	14	30	24	2	1	23	50		45
S. macrocarpa	22	2	1	20	45	24	2	1	20	47	23	0	0	27	50		47
S. moorcroftiana	6	2	0	9	17	16	4	0	16	36	22	4	1	19	46		86
S. prazeri	16	0	0	14	30	22	1	0	27	50	15	1	0	16	32		86
S. tomentosa	16	7	0	10	33	19	12	0	15	46	22	9	0	13	44		36
S. toromiro	26	0	0	21	47	27	0	0	23	50	24	0	0	26	50		52
S. velutina	11	1	0	10	22	13	7	0	16	36	17	8	1	21	47		66
S. wilsonii	14	0	0	9	14	16	5	1	13	35	21	6	2	17	46		62
F forward, R reverse, C complement, P palindromic matching.

## Sheet: Table S8
Table S8.Number of repeats in the IR, LSC, and SSC of fourteen Sophora species.
	IR				LSC				SSC
	Forward	Reverse	Complement	Palindromic	Forward	Reverse	Complement	Palindromic	Forward	Reverse	Complement	Palindromic
S. alopecuroides	6	0	0	0	3	0	0	10	0	0	0	1
S. flavescens	6	0	0	0	5	4	0	13	0	0	0	2
S. tonkinensis	5	2	1	2	18	0	4	19	8	12	5	10
S. albescens	2	0	0	0	9	11	0	13	1	0	0	1
S. davidii	5	0	0	0	8	2	3	13	2	0	0	1
S. dunnii	2	0	0	0	9	10	3	12	0	0	0	4
S. franchetiana	4	0	0	1	11	2	1	10	0	0	0	3
S. moorcroftiana	5	0	0	0	7	4	2	12	2	0	0	0
S. prazeri	8	0	0	0	9	2	1	5	1	1	0	5
S. tomentosa	2	0	0	0	18	10	1	11	1	3	1	2
S. velutina	2	0	0	0	7	8	2	15	0	0	0	2
S. wilsonii	4	1	0	0	9	3	1	10	2	0	0	1
S. macrocarpa	5	1	0	0	17	2	0	10	1	0	0	4
S. toromiro	7	0	0	0	21	5	0	15	0	0	0	3

## Sheet: Table S9
Table S9. Number of nucleotides in variable site and Nucleotide diversity analysis among 14 Sophora species.
Number of sites	Invariable (monomorphic) sites	Variable (polymorphic) sites	Singleton variable sites (SV)	Parsimony informative sites (PIS)	SV2V	PIS2V	SV3V	PIS3V	SIS4V	PIS4V	Number of polymorphic (segregating) sites	Total number of mutations (Eta)	Sites with missing data	Theta (per site) from Eta	Nucleotide diversity (max)
169235	135936	8067	4145	3922	4056	3638	88	272	1	12	8067	8067	25232	0.01846	0.08275
Variable site analysis shows the presence of singleton variable sites (SV) and parsimony informative sites (PIS) in the twelve Sophora chloroplast genomes. SV2V singleton variable sites with two variants, SV3V singleton variable sites with three variants, PIS2V parsimony informative sites with two variants, and PIS3V parsimony informative sites with three variants.

## Sheet: Table S10
Table S10. Thirty regions of highly variable sequences in 14 Sophora species.
High variable marker	Length (bp)	Variable sites	Nucleotide diversity (Pi)
trnK-matK	677	53	0.02669
trnK-rbcL	1042	72	0.03495
rbcL-atpB	755	48	0.02131
atpB-trnM	657	53	0.02174
trnV-ndhC	694	74	0.03505
ndhJ-trnC	719	84	0.04429
rpoB	600	44	0.0204
ropC1	631	50	0.0221
atpL	1169	62	0.02874
trnT-trnL	1295	57	0.02619
petN-trnD	1444	235	0.08275
trnE-trnT	652	71	0.03545
trnG-trnfM	714	70	0.03525
psaA-ycf3	645	60	0.02854
psbK	663	56	0.02673
rps16-accD	613	78	0.03402
ycf4-cemA	675	70	0.03399
psbE-petL	887	86	0.03927
psaJ-rpl33	656	88	0.03919
clpP1-psbB	609	57	0.02465
petB	720	57	0.02439
petD-rpoA	617	49	0.0226
rpl36	778	76	0.03922
rpl22-rps19	736	72	0.03773
ycf1	609	81	0.04033
ccsA-rpl32	723	65	0.03051
ndhD	627	47	0.02467
ndhA	639	71	0.03918
rps15-ndhH	652	92	0.04503
ycf1	1224	148	0.07101

[truncated: 1 more sheets: Table S11]
